# Supplementary material for: Realization of multi-configurable logic gate behaviour on fluorescence switching signalling of naphthalene diimide congeners
Source: Royal Society of Chemistry journal article supplement (doi:10.1039/d1ra06728a), 2021-01-01
Supplement: d1ra06728a1.pdf [file d1ra06728a1.pdf]

## Electronic Supplementary Information (ESI)

### Realization of Multi-Configurable Logic Gate Behaviour on Fluorescence Switching Signalling of Naphthalene Diimide Congeners

Hridoy Jyoti Bora,<sup>a</sup> Pranjal Barman,<sup>b</sup> Sushanta Bordoloi,<sup>c</sup> Gautomi Gogoi,<sup>a</sup> Bedanta Gogoi,<sup>d</sup> Neelotpal Sen Sarma<sup>a</sup> and Anamika Kalita<sup>a\*</sup>

- Physical Sciences Division, Institute of Advanced Study in Science and Technology, Paschim Boragaon, Guwahati-781035, Assam, India.
- Department of Electronics and Communication Technology, Gauhati University, Guwahati-781014, Assam, India.
- Department of Electronics and Communication Engineering, National Institute of Technology Mizoram, Aizawl-796012, India.
- Department of Chemistry, Gauhati University, Guwahati-781014, Assam, India.

Corresponding Author's Email: [anamik.kalita01@gmail.com](mailto:anamik.kalita01@gmail.com)

#### Detailed Synthetic scheme of N2:

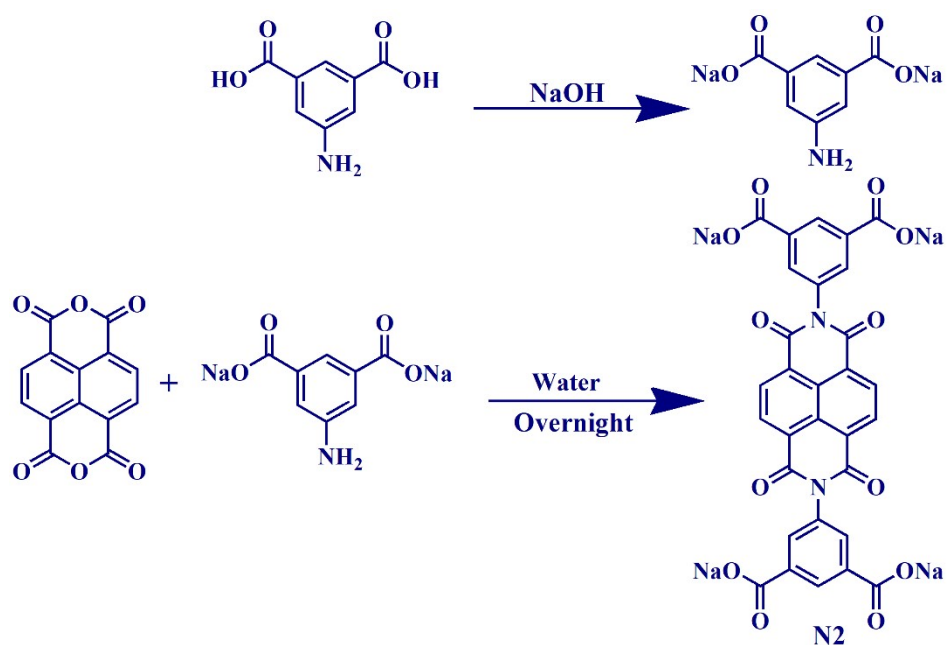

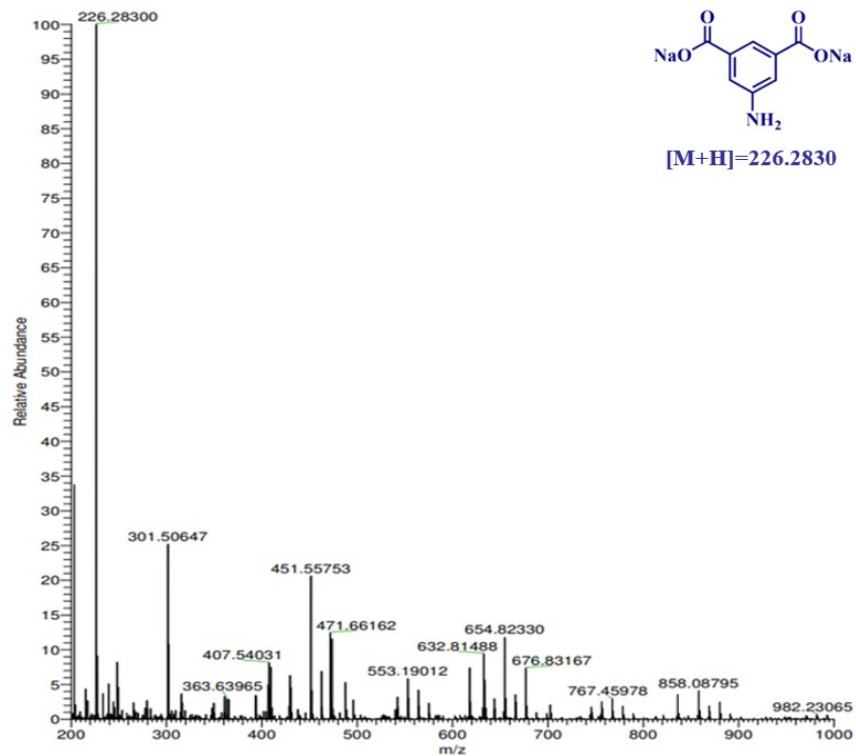

**Fig. S1** ESI-MS spectra of sodium salt of 5-amino isophthalic acid.

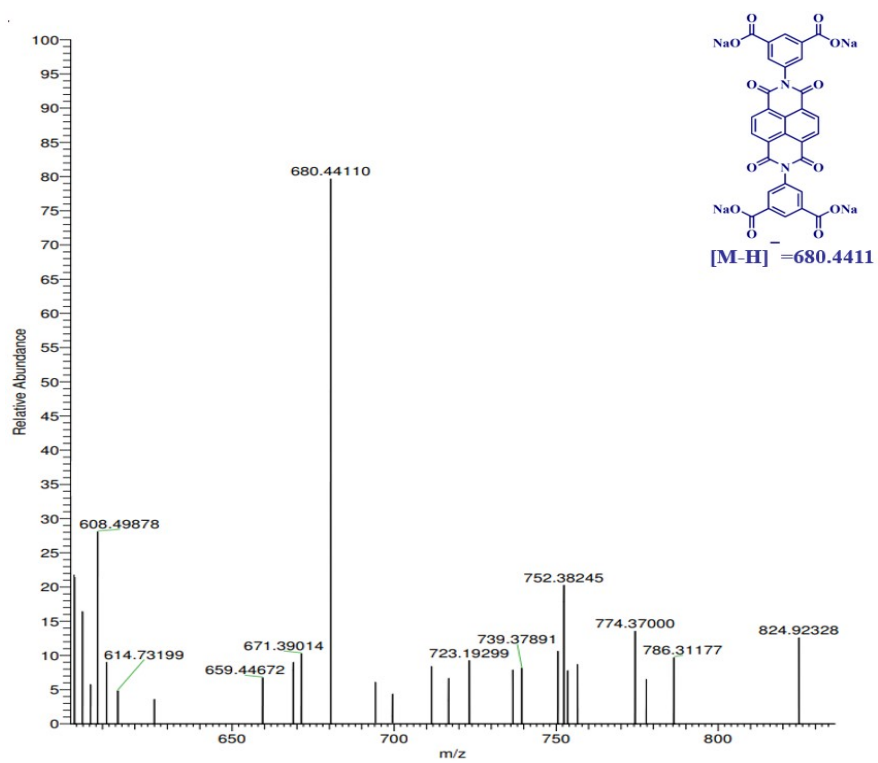

**Fig. S2** ESI-MS spectra of N2.

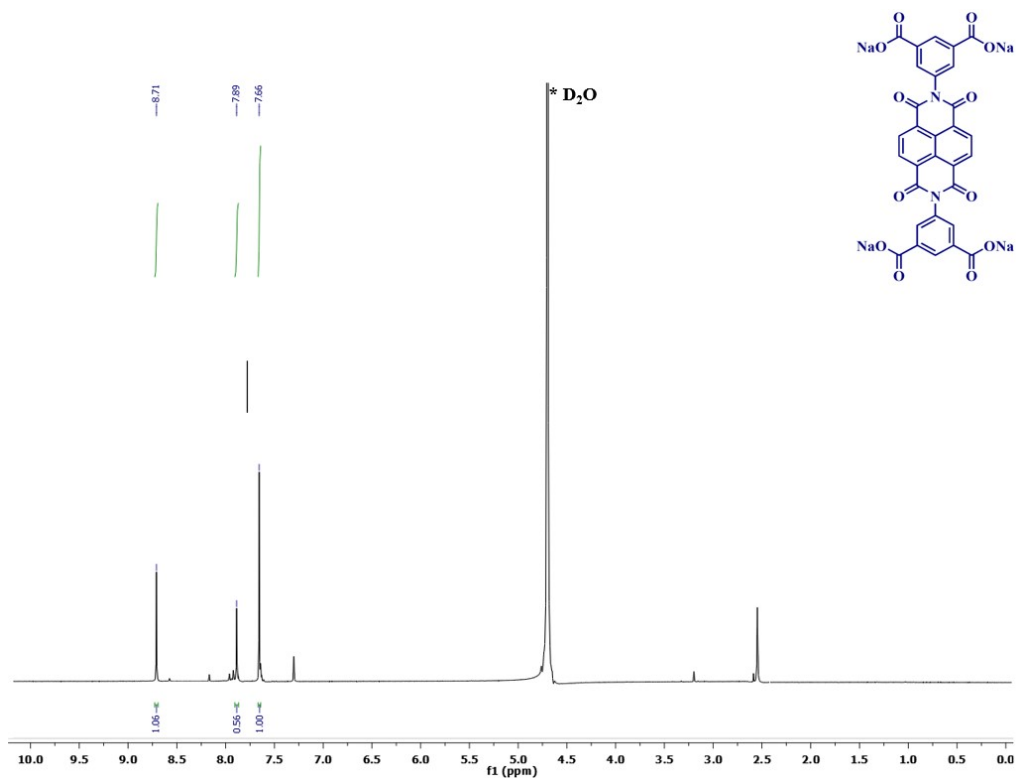

Fig. S3  $^1\text{H-NMR}$  ( $\text{D}_2\text{O}$ ) spectra of N2.

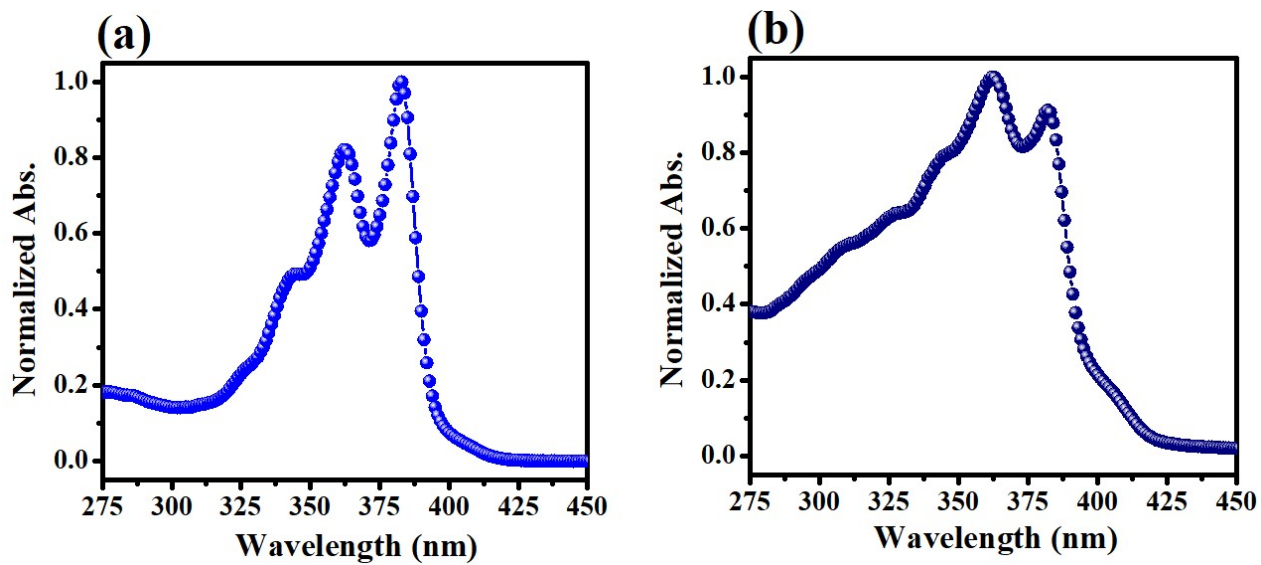

Fig. S4 Normalized absorption spectra of N1 (a) and N2 (b) in solution.



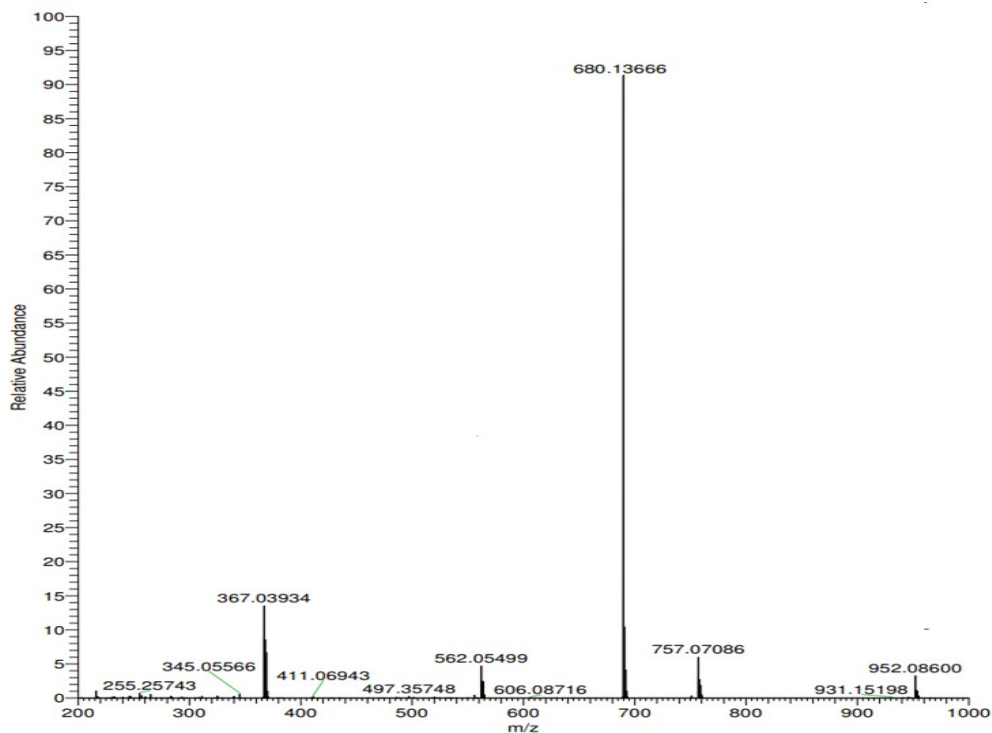

**Fig. S7** ESI-MS spectra of the product formed after addition of NaOH to N1.

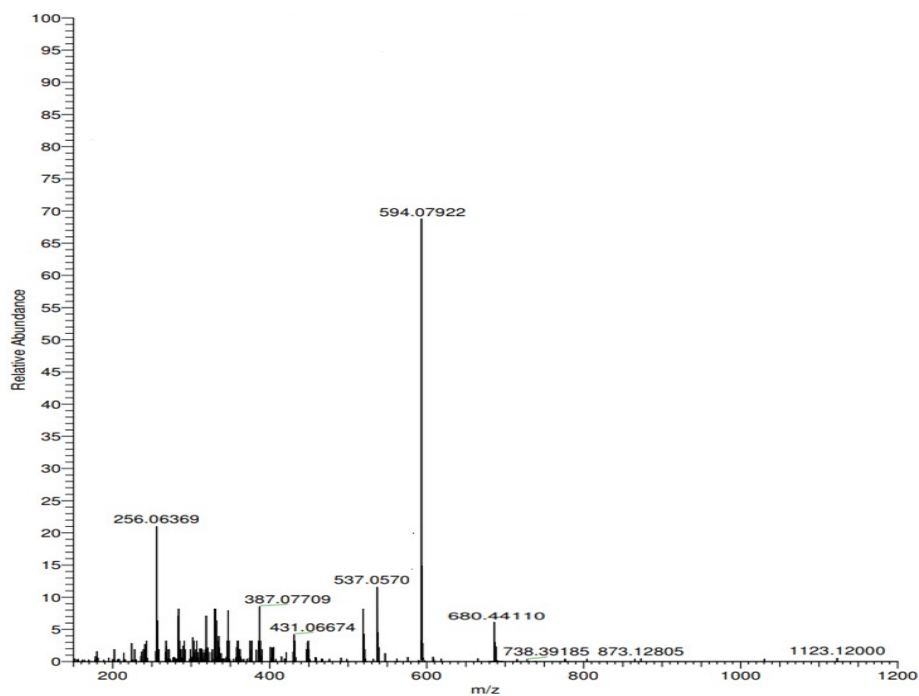

**Fig. S8** ESI-MS spectra of the product formed after addition of HCl to N2.

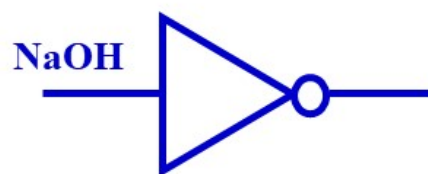

| System | Input (NaOH) | Output (Emission intensity) |
|--------|--------------|-----------------------------|
| N1     | 0            | 1 (on)                      |
|        | 1            | 0 (off)                     |

**Fig. S9** Representation of NOT logic gate and corresponding truth table obtained for N1.

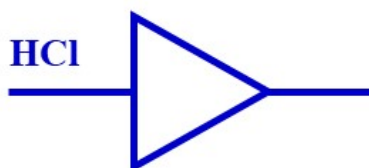

| System | Input (HCl) | Output (Emission intensity) |
|--------|-------------|-----------------------------|
| N2     | 0           | 0 (off)                     |
|        | 1           | 1 (on)                      |

**Fig. S10** Representation of YES logic gate and corresponding truth table obtained for N2.
